# Supplementary material for: Solvent-induced hierarchical self-assembly of amphiphilic PEG(Gm)-b-PS dendritic-linear block copolymers
Source: Royal Society of Chemistry journal article supplement (doi:10.1039/c3sm52439f), 2013-01-01
Supplement: c3sm52439f.pdf [file c3sm52439f.pdf]

## Supporting Information for

# Solvent-Induced Hierarchical Self-Assembly of Amphiphilic PEG( $G_m$ )-*b*-PS Dendritic-Linear Block Copolymers

Huanhuan Cai, Guoliang Jiang, Zhihao Shen,\* Xinghe Fan\*

Beijing National Laboratory for Molecular Sciences, Key Laboratory of Polymer Chemistry and Physics of Ministry of Education, College of Chemistry and Molecular Engineering, Peking University, Beijing 100871, China

\* To whom the correspondence should be addressed. E-mail: zshen@pku.edu.cn; fanxh@pku.edu.cn.

### Contents

|                                                                                                                                                                                                                                                                        |    |
|------------------------------------------------------------------------------------------------------------------------------------------------------------------------------------------------------------------------------------------------------------------------|----|
| <b>Table S1.</b> Molecular characteristics and CAC value of the reference polymer                                                                                                                                                                                      | S2 |
| <b>Figure S1.</b> GPC profiles of the reference DLBCP and its corresponding linear PS block after hydrolysis                                                                                                                                                           | S2 |
| <b>Figure S2.</b> Fluorescence spectra of pyrene ( $8 \times 10^{-7}$ M) in water at different concentrations and the plot of $I_{373}/I_{384}$ in the emission spectra of pyrene in aqueous solutions with respect to the concentration of PEG( $G_1$ )- <i>b</i> -PS | S3 |
| <b>Figure S3.</b> Fluorescence intensity ratios ( $I_{373}/I_{384}$ ) of pyrene excitation bands (373 and 384 nm) as a function of the concentration of PEG( $G_2$ )- <i>b</i> -PS and PEG( $G_3$ )- <i>b</i> -PS aqueous solutions                                    | S4 |
| <b>Figure S4.</b> SEM micrographs of PEG( $G_1$ )- <i>b</i> -PS at a water content of 23.4 %                                                                                                                                                                           | S4 |
| <b>Figure S5.</b> Turbidity measurements for 0.1 wt % of PEG( $G_1$ )- <i>b</i> -PS in THF on addition of water and subsequent addition of THF                                                                                                                         | S5 |
| <b>Figure S6.</b> TEM micrographs of PEG( $G_1$ )- <i>b</i> -PS at corresponding water contents as indicated in Figure S4 during the addition of THF                                                                                                                   | S5 |
| <b>Figure S7.</b> TEM micrographs of PEG( $G_1$ )- <i>b</i> -PS at a water content of 23.4 % from freeze-fracture-etching-replica technique                                                                                                                            | S6 |
| <b>Figure S8.</b> SEM micrographs of PEG( $G_3$ )- <i>b</i> -PS at a water content of 18.5 %                                                                                                                                                                           | S6 |

**Table S1.** Molecular Characteristics and CAC Value of the Reference Polymer

| sample                         | $M_n^a$<br>( $\times 10^4$ g/mol) | PDI  | $M_{n, PS}^a$<br>( $\times 10^4$ g/mol) | $PDI_{PS}$ | $w_{PEG}^b$ | CMC<br>( $10^{-5}$<br>mg/mL) |
|--------------------------------|-----------------------------------|------|-----------------------------------------|------------|-------------|------------------------------|
| PEG( $G_1$ )- <i>b</i> -PS-Ref | 0.52                              | 1.09 | 0.37                                    | 1.08       | 0.21        | 1.76                         |

<sup>a</sup> Apparent number-average molecular weight ( $M_n$ ) and polydispersity index (PDI) were measured by gel permeation chromatography using PS standards. <sup>b</sup> Weight fraction of the hydrophilic PEG part.

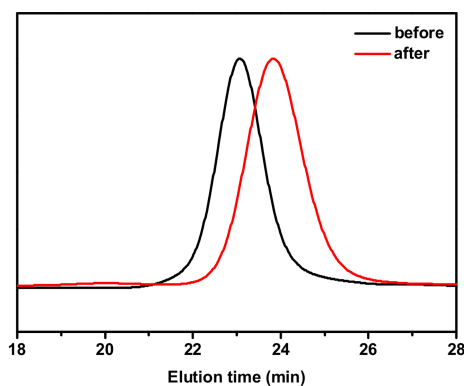

**Figure S1.** GPC profiles of the reference DLBCP and its corresponding linear PS block after hydrolysis.

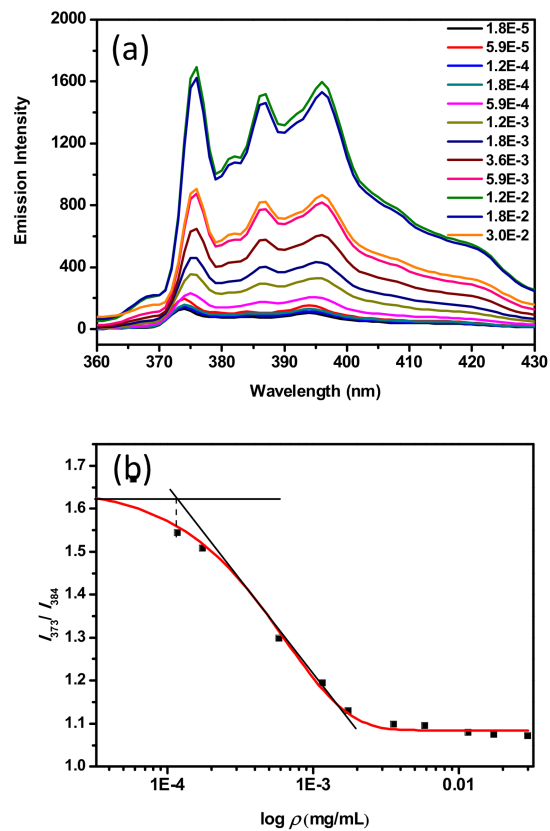

Figure S2. Fluorescence spectra of pyrene ( $8 \times 10^{-7}$  M) in water at different concentrations (a) and the plot of  $I_{373}/I_{384}$  in the emission spectra of pyrene in aqueous solutions with respect to the concentration of PEG( $G_1$ )-*b*-PS (b).

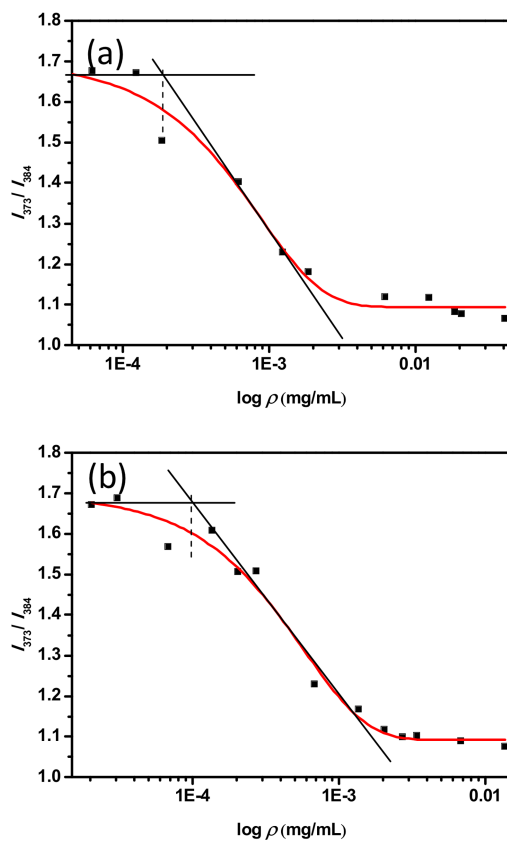

**Figure S3.** Fluorescence intensity ratios ( $I_{373}/I_{384}$ ) of pyrene excitation bands (373 and 384 nm) as a function of the concentration of PEG(G<sub>2</sub>)-*b*-PS and PEG(G<sub>3</sub>)-*b*-PS aqueous solutions.

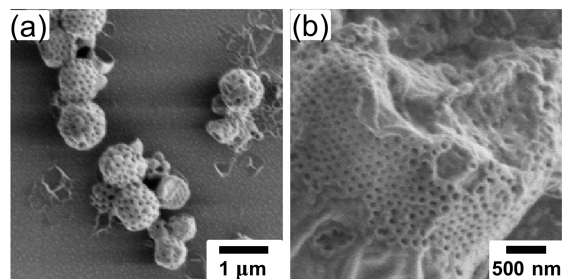

**Figure S4.** SEM micrographs of PEG(G<sub>1</sub>)-*b*-PS at a water content of 23.4 %.

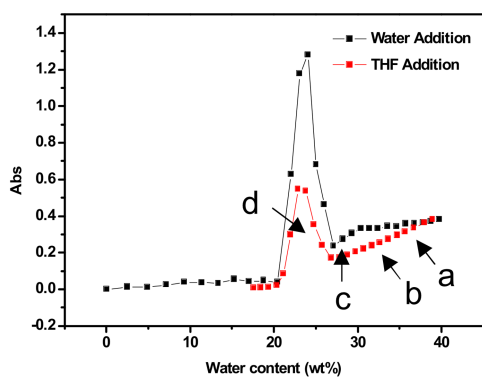

**Figure S5.** Turbidity measurements for 0.1 wt % of PEG( $G_1$ )-*b*-PS in THF on addition of water and subsequent addition of THF.

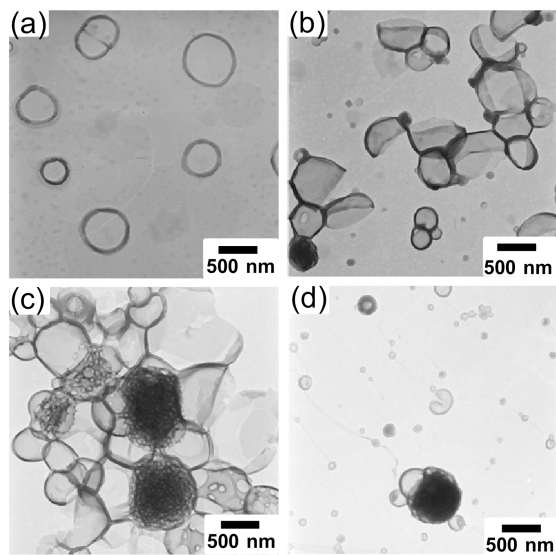

**Figure S6.** TEM micrographs of PEG( $G_1$ )-*b*-PS at corresponding water contents as indicated in Figure S4 during the addition of THF.

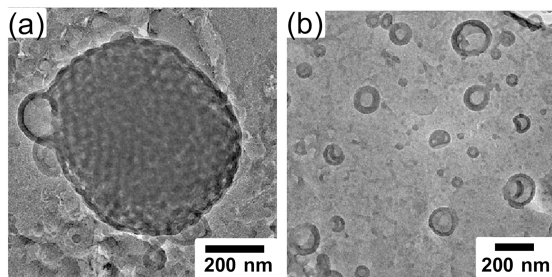

**Figure S7.** TEM micrographs of PEG( $G_1$ )-*b*-PS at a water content of 23.4 % from the freeze-fracture-etching-replica technique.

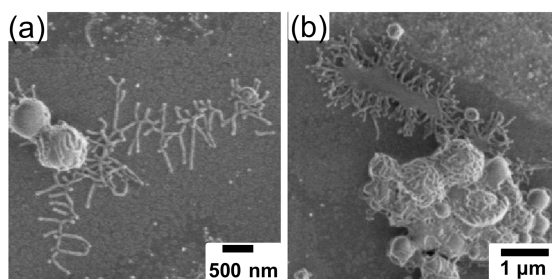

**Figure S8.** SEM micrographs of PEG( $G_3$ )-*b*-PS at a water content of 18.5 %.
